# Supplementary material for: Indium(iii)/2-benzoylpyridine chemistry: interesting indium(iii) bromide-assisted transformations of the ligand
Source: Royal Society of Chemistry journal article supplement (doi:10.1039/d2dt02851d), 2022-01-01
Supplement: d2dt02851d1.pdf [file d2dt02851d1.pdf]

## ELECTRONIC SUPPLEMENTARY INFORMATION (ESI)

### Indium(III)/2-benzoylpyridine chemistry: interesting indium(III) bromide-assisted transformations of the ligand

*Christina Stamou<sup>a</sup>, Zoi G. Lada<sup>b</sup>, Christos T. Chasapis<sup>c</sup>, Dionissios  
Papaioannou, Pierre Dechambenoit\*<sup>d</sup> and Spyros P. Perlepes\*<sup>a, b</sup>*

---

<sup>a</sup> Department of Chemistry, University of Patras, 26504 Patras, Greece.

E-mail: perlepes@upatras.gr

<sup>b</sup> Institute of Chemical Engineering Sciences (ICE-HT), Foundation for Research and  
Technology-Hellas (FORTH), P.O. Box 1414, Platani, 26504 Patras, Greece.

<sup>c</sup> NMR Facility, Instrumental Analysis Laboratory, School of Natural Sciences,  
University of Patras, 26504 Patras, Greece.

<sup>d</sup> Centre de Recherche Paul Pascal, UMR 5031, CNRS, University of Bordeaux,  
33600 Pessac, France.

| <u>Contents</u> |                                                                                                                                                                                                                                                                                                                                                                                                                                                                                                                                                                                                                                                                                 | <u>Page</u> |
|-----------------|---------------------------------------------------------------------------------------------------------------------------------------------------------------------------------------------------------------------------------------------------------------------------------------------------------------------------------------------------------------------------------------------------------------------------------------------------------------------------------------------------------------------------------------------------------------------------------------------------------------------------------------------------------------------------------|-------------|
| <b>Table S1</b> | Crystallographic data for compounds <b>1</b> , <b>3</b> and <b>4</b>                                                                                                                                                                                                                                                                                                                                                                                                                                                                                                                                                                                                            | 4           |
| <b>Table S2</b> | Selected bond distances, bond angles and intermolecular interactions in complex <b>1</b>                                                                                                                                                                                                                                                                                                                                                                                                                                                                                                                                                                                        | 5           |
| <b>Table S3</b> | Selected bond distances, bond angles and intermolecular interactions in complex <b>3</b>                                                                                                                                                                                                                                                                                                                                                                                                                                                                                                                                                                                        | 6           |
| <b>Table S4</b> | Selected bond distances, bond angles and intermolecular interactions in complex <b>4</b>                                                                                                                                                                                                                                                                                                                                                                                                                                                                                                                                                                                        | 7           |
| <b>Fig. S1</b>  | Emission spectrum of solid $[\text{In}_2\text{Br}_4\{(\text{py})(\text{ph})\text{CH}(\text{O})_2\}_2(\text{EtOH})_2]$ ( <b>4</b> ) at room temperature under maximum excitation at 300 nm; the broad emission band is located at ~410 nm. This spectrum is in line with the fact that no satisfactory Raman spectrum of <b>4</b> could be recorded due to fluorescence. Despite the shorter excitation wavelength (300 nm) in this experiment, compared to the larger excitation laser wavelengths in the Raman experiments (514.5 nm and 632.8 nm), it is clear that a portion of fluorescence remains at $\lambda > 500$ nm and thus fluorescence dominates the Raman effect. | 8           |
| <b>Fig. S2</b>  | Stick representation of the crystal structure of <b>1</b> along the ( <i>ac</i> ) plane, showing the packing of the complex molecules and the lattice (ph)(ph)CO molecules interacting through O-H...N H bonds (dashed green lines). The weak intermolecular C-H...O and C-H...Cl interactions are depicted in dashed orange lines. Colour code: C, grey; H, white; N, blue; O, red; Cl, light green; In, brown.                                                                                                                                                                                                                                                                | 9           |
| <b>Fig. S3</b>  | Unlabelled ORTEP-type views of the octahedral complex anion $[\text{InBr}_4\{(\text{ph})(\text{ph})\text{CO}\}]^-$ and the cation $\text{L}^+$ that are present in the crystal structure of <b>3</b> at 120 K. Thermal ellipsoids are depicted at 50% probability level. H atoms are omitted for clarity. Colour code: C, grey; N, blue; O, red; Br, orange; In, brown.                                                                                                                                                                                                                                                                                                         | 9           |
| <b>Fig. S4</b>  | Stick representation of the crystal structure of <b>3</b> along the ( <i>ac</i> ) plane, showing the packing of the complex anions and the organic cations. The weak intermolecular (a better description is "interionic") C-H...O and C-H...Br interactions are depicted in dashed orange lines. Colour code: C, grey; H, white; N, blue; O, red; Br, orange; In, brown.                                                                                                                                                                                                                                                                                                       | 10          |
| <b>Fig. S5</b>  | Unlabelled ORTEP-type view of the dinuclear molecule that is present in the crystal structure of <b>4</b> at 120 K. Thermal ellipsoids are depicted at 50% probability level. The H bonds are represented by dashed green lines. H atoms are omitted for clarity, except those involved in the intramolecular $\text{O}_{\text{ethanol}}\text{-H}\cdots\text{Br}$ H bonds. Colour code: C, grey; N, blue; O, red; Br, orange; In, brown.                                                                                                                                                                                                                                        | 11          |

| <u>Contents</u>                                                                                                                                                                                                                                                                                                                                                                                                                                               | <u>Page</u> |
|---------------------------------------------------------------------------------------------------------------------------------------------------------------------------------------------------------------------------------------------------------------------------------------------------------------------------------------------------------------------------------------------------------------------------------------------------------------|-------------|
| <b>Fig. S6</b> The IR spectrum (KBr, $\text{cm}^{-1}$ ) of complex $[\text{InCl}_3\{(\text{py})(\text{ph})\text{CO}\}(\text{EtOH})]\cdot\{(\text{py})(\text{ph})\text{CO}\}$ ( <b>1</b> ).                                                                                                                                                                                                                                                                    | 12          |
| <b>Fig. S7</b> The $^1\text{H}$ NMR spectrum ( $\delta/\text{ppm}$ ) of complex $[\text{InCl}_3\{(\text{py})(\text{ph})\text{CO}\}(\text{EtOH})]\cdot\{(\text{py})(\text{ph})\text{CO}\}$ ( <b>1</b> ) in $d_6$ -DMSO.                                                                                                                                                                                                                                        | 12          |
| <b>Fig. S8</b> The IR spectrum (KBr, $\text{cm}^{-1}$ ) of complex (L) $[\text{InBr}_4\{(\text{py})(\text{ph})\text{CO}\}]$ ( <b>3</b> ).                                                                                                                                                                                                                                                                                                                     | 13          |
| <b>Fig. S9</b> The IR spectrum (KBr, $\text{cm}^{-1}$ ) of 2-benzoylpyridine, $(\text{py})(\text{ph})\text{CO}$ .                                                                                                                                                                                                                                                                                                                                             | 13          |
| <b>Fig. S10</b> The Raman spectra ( $\text{cm}^{-1}$ ) of free $(\text{py})(\text{ph})\text{CO}$ (bottom) and complex $[\text{InCl}_3\{(\text{py})(\text{ph})\text{CO}\}(\text{EtOH})]\cdot\{(\text{py})(\text{ph})\text{CO}\}$ ( <b>1</b> ) in the region $1750\text{-}120\text{ cm}^{-1}$ .                                                                                                                                                                 | 14          |
| <b>Fig. S11</b> The $^1\text{H}$ NMR spectrum ( $\delta/\text{ppm}$ ) of $(\text{py})(\text{ph})\text{CO}$ in the aromatic region; the solvent used is $d_6$ -DMSO..                                                                                                                                                                                                                                                                                          | 14          |
| <b>Fig. S12</b> The $^1\text{H}$ NMR spectrum ( $\delta/\text{ppm}$ ) of complex $[\text{In}_2\text{Br}_4\{(\text{py})(\text{ph})\text{CH}(\text{O})_2\}_2(\text{EtOH})_2]$ ( <b>4</b> ) in the aromatic region; the solvent used is $d_6$ -DMSO.                                                                                                                                                                                                             | 15          |
| <b>Fig. S13</b> The IR spectrum (KBr, $\text{cm}^{-1}$ ) of compound $\{(\text{pyH})(\text{ph})\text{CO}\}\text{Cl}$ ( <b>2</b> ). The broad band at $\sim 3440\text{ cm}^{-1}$ is due to residual EtOH from incomplete dryness of this particular sample (also evident in the $^1\text{H}$ and $^{13}\text{C}\{^1\text{H}\}$ NMR spectra.                                                                                                                    | 15          |
| <b>Fig. S14</b> The $^1\text{H}$ NMR spectrum ( $\delta/\text{ppm}$ ) of compound <b>2</b> in the $9.2\text{-}7.4\text{ ppm}$ region; the solvent used is $d_6$ -DMSO.                                                                                                                                                                                                                                                                                        | 16          |
| <b>Fig. S15</b> The $^{13}\text{C}\{^1\text{H}\}$ NMR spectrum of $(\text{py})(\text{ph})\text{CO}$ in $d_6$ -DMSO; the signal at $\delta 39.2\text{ ppm}$ is due to the methyl carbons of the solvent.                                                                                                                                                                                                                                                       | 16          |
| <b>Fig. S16</b> The $^{13}\text{C}\{^1\text{H}\}$ NMR spectrum of $(\text{py})(\text{ph})\text{CO}$ in $d_6$ -DMSO; the signal at $\delta 39.1\text{ ppm}$ is due to the methyl carbons of $d_6$ -DMSO. The signals at $\delta 56.8$ and $18.4\text{ ppm}$ arise from the carbons of residual EtOH from incomplete dryness of this particular sample; the presence of EtOH in this sample is also evident in its $^1\text{H}$ NMR and IR spectrum (Fig. S13). | 17          |
| <b>Fig. S17</b> The ESI-MS spectrum of $\{(\text{pyH})(\text{ph})\text{CO}\}\text{Cl}$ ( <b>2</b> ) in the negative mode.                                                                                                                                                                                                                                                                                                                                     | 18          |

**Table S1** Crystallographic data for compounds 1, 3, 4

| Parameter                                                               | Complex 1                                                                       | Complex 3                                                                       | Complex 4                                                                                     |
|-------------------------------------------------------------------------|---------------------------------------------------------------------------------|---------------------------------------------------------------------------------|-----------------------------------------------------------------------------------------------|
| Formula                                                                 | C <sub>26</sub> H <sub>24</sub> Cl <sub>3</sub> InN <sub>2</sub> O <sub>3</sub> | C <sub>24</sub> H <sub>17</sub> Br <sub>4</sub> InN <sub>2</sub> O <sub>2</sub> | C <sub>28</sub> H <sub>32</sub> Br <sub>4</sub> In <sub>2</sub> N <sub>2</sub> O <sub>4</sub> |
| <i>F</i> <sub>w</sub>                                                   | 633.64                                                                          | 799.85                                                                          | 1009.83                                                                                       |
| Crystal colour                                                          | Colourless                                                                      | Yellow                                                                          | Colourless                                                                                    |
| Crystal size (mm)                                                       | 0.46x0.15x0.05                                                                  | 0.15x0.02x0.01                                                                  | 0.32x0.08x0.03                                                                                |
| Crystal system                                                          | Monoclinic                                                                      | Monoclinic                                                                      | Monoclinic                                                                                    |
| Space group                                                             | <i>P2</i> <sub>1</sub> / <i>c</i>                                               | <i>C2</i> / <i>c</i>                                                            | <i>P2</i> <sub>1</sub> / <i>c</i>                                                             |
| Temperature/K                                                           | 120                                                                             | 120                                                                             | 120                                                                                           |
| <i>a</i> /Å                                                             | 17.5180(9)                                                                      | 34.562(4)                                                                       | 12.421(9)                                                                                     |
| <i>b</i> /Å                                                             | 7.7740(4)                                                                       | 7.6912(10)                                                                      | 10.4041(7)                                                                                    |
| <i>c</i> /Å                                                             | 19.4933(9)                                                                      | 19.859(3)                                                                       | 25.5262(19)                                                                                   |
| <i>β</i> /°                                                             | 100.390(2)                                                                      | 108.002(14)                                                                     | 90.439(4)                                                                                     |
| <i>V</i> /Å <sup>3</sup>                                                | 2611.2(2)                                                                       | 5020.5(12)                                                                      | 3298.8(4)                                                                                     |
| <i>Z</i>                                                                | 4                                                                               | 8                                                                               | 4                                                                                             |
| <i>I</i> <sub>calcd</sub>                                               | 1.612                                                                           | 2.116                                                                           | 2.033                                                                                         |
| Radiation/ <i>μ</i> (mm <sup>-1</sup> )                                 | Mo Ka/1.243                                                                     | Mo Ka/7.333                                                                     | Mo Ka/6.278                                                                                   |
| <i>θ</i> <sub>min</sub> - <i>θ</i> <sub>max</sub> /°                    | 2.124-28.906                                                                    | 2.479-19.933                                                                    | 1.596-27.556                                                                                  |
| Reflns collected/unique                                                 | 86266/6788                                                                      | 36527/2247                                                                      | 153532/7611                                                                                   |
| Completeness to 2 <i>θ</i>                                              | 0.985                                                                           | 0.966                                                                           | 0.988                                                                                         |
| <i>R</i> <sub>int</sub>                                                 | 0.0725                                                                          | 0.1802                                                                          | 0.0456                                                                                        |
| Refined parameters/<br>restraints                                       | 320/1                                                                           | 298/108                                                                         | 369/2                                                                                         |
| <i>R</i> <sub>1</sub> <sup>a</sup> ( <i>I</i> >2 <i>σ</i> ( <i>I</i> )) | 0.0250                                                                          | 0.0602                                                                          | 0.0393                                                                                        |
| <i>wR</i> <sub>2</sub> <sup>b</sup> (all data)                          | 0.0554                                                                          | 0.1175                                                                          | 0.0916                                                                                        |
| GOF ( <i>F</i> <sup>2</sup> )                                           | 1.028                                                                           | 1.129                                                                           | 1.127                                                                                         |

<sup>a</sup>  $R_1 = \sum ||F_o| - |F_c|| / \sum |F_o|$ . <sup>b</sup>  $wR_2 = \{\sum w(F_o^2 - F_c^2)^2 / \sum w(F_o^2)^2\}^{1/2}$ .

**Table S2** Selected bond distances, bond angles and intermolecular interactions in complex **1**

| <i>Distances in Å</i> |            | <i>Selected angles in °</i> |             |
|-----------------------|------------|-----------------------------|-------------|
| In1 O2                | 2.2051(13) | O2 In1 N1                   | 78.79(5)    |
| In1 N1                | 2.2991(15) | O2 In1 O1                   | 85.98(4)    |
| In1 O1                | 2.3623(12) | N1 In1 O1                   | 68.96(5)    |
| In1 Cl3               | 2.3926(5)  | O2 In1 Cl3                  | 91.74(4)    |
| In1 Cl2               | 2.4053(4)  | N1 In1 Cl3                  | 157.99(4)   |
| In1 Cl1               | 2.4419(5)  | O1 In1 Cl3                  | 90.77(3)    |
| O1 C6                 | 1.234(2)   | O2 In1 Cl2                  | 90.09(4)    |
| O3 C18                | 1.217(2)   | N1 In1 Cl2                  | 93.81(4)    |
|                       |            | O1 In1 Cl2                  | 162.75(3)   |
| O1 N2 (H-bond)        | 2.675(1)   | Cl3 In1 Cl2                 | 106.143(17) |
| C2 Cl1                | 3.364(1)   | O2 In1 Cl1                  | 166.01(3)   |
| O3 C20                | 3.502(1)   | N1 In1 Cl1                  | 88.48(4)    |
| O3 C13                | 3.312(1)   | O1 In1 Cl1                  | 84.03(3)    |
|                       |            | Cl3 In1 Cl1                 | 98.153(18)  |
|                       |            | Cl2 In1 Cl1                 | 96.588(17)  |

**Table S3** Selected bond distances, bond angles and intermolecular interactions in complex **3**

| <i>Distances in Å</i> |           | <i>Selected angles in °</i> |           |
|-----------------------|-----------|-----------------------------|-----------|
| In1 N1                | 2.313(13) | N1 In1 O1                   | 69.2(5)   |
| In1 O1                | 2.344(11) | N1 In1 Br4                  | 158.2(4)  |
| In1 Br4               | 2.563(2)  | O1 In1 Br4                  | 89.1(3)   |
| In1 Br3               | 2.592(2)  | N1 In1 Br3                  | 95.4(4)   |
| In1 Br2               | 2.623(3)  | O1 In1 Br3                  | 164.6(3)  |
| In1 Br1               | 2.647(2)  | Br4 In1 Br3                 | 106.30(8) |
| O1 C6                 | 1.251(19) | N1 In1 Br2                  | 87.2(3)   |
| O2 C13                | 1.18(2)   | O1 In1 Br2                  | 86.5(3)   |
| N2 C19                | 1.41(2)   | Br4 In1 Br2                 | 93.56(7)  |
|                       |           | Br3 In1 Br2                 | 93.91(8)  |
| C15 C22               | 3.382(1)  | N1 In1 Br1                  | 84.9(3)   |
| C16 C21               | 3.284(1)  | O1 In1 Br1                  | 84.6(3)   |
| C10 O2                | 3.201(1)  | Br4 In1 Br1                 | 91.33(7)  |
| C20 Br4               | 3.648(1)  | Br3 In1 Br1                 | 93.33(8)  |
| C18 Br3               | 3.627(1)  | Br2 In1 Br1                 | 169.77(9) |
| C18 Br2               | 3.533(1)  |                             |           |

**Table S4** Selected bond distances, bond angles and intermolecular interactions in complex **4**

| <i>Distances in Å</i> |           | <i>Selected angles in °</i> |            |
|-----------------------|-----------|-----------------------------|------------|
| In2 O1                | 2.135(3)  | O1 In2 O2                   | 73.33(12)  |
| In2 O2                | 2.161(3)  | O1 In2 N2                   | 145.22(14) |
| In2 N2                | 2.235(4)  | O2 In2 N2                   | 73.86(13)  |
| In2 O4                | 2.291(4)  | O1 In2 O4                   | 81.90(13)  |
| In2 Br3               | 2.5319(6) | O2 In2 O4                   | 82.05(13)  |
| In2 Br4               | 2.6220(6) | N2 In2 O4                   | 82.49(14)  |
| In1 O2                | 2.134(3)  | O1 In2 Br3                  | 110.78(9)  |
| In1 O1                | 2.184(3)  | O2 In2 Br3                  | 171.99(9)  |
| In1 N1                | 2.248(4)  | N2 In2 Br3                  | 100.53(11) |
| In1 O3                | 2.281(4)  | O4 In2 Br3                  | 91.63(9)   |
| In1 Br1               | 2.5372(6) | O1 In2 Br4                  | 94.54(9)   |
| In1 Br2               | 2.6138(6) | O2 In2 Br4                  | 91.89(9)   |
| O2 C18                | 1.406(5)  | N2 In2 Br4                  | 97.75(11)  |
| O1 C6                 | 1.406(6)  | O4 In2 Br4                  | 173.63(9)  |
|                       |           | Br3 In2 Br4                 | 94.58(2)   |
| O3 Br4 (H-bond)       | 3.210(1)  | O2 In1 O1                   | 72.87(12)  |
| O4 Br2 (H-bond)       | 3.279(1)  | O2 In1 N1                   | 144.40(14) |
|                       |           | O1 In1 N1                   | 73.33(13)  |
|                       |           | O2 In1 O3                   | 81.37(13)  |
|                       |           | O1 In1 O3                   | 84.07(13)  |
|                       |           | N1 In1 O3                   | 84.36(15)  |
|                       |           | O2 In1 Br1                  | 113.28(9)  |
|                       |           | O1 In1 Br1                  | 167.48(9)  |
|                       |           | N1 In1 Br1                  | 98.00(11)  |
|                       |           | O3 In1 Br1                  | 86.12(10)  |
|                       |           | O2 In1 Br2                  | 91.41(9)   |
|                       |           | O1 In1 Br2                  | 92.34(9)   |
|                       |           | N1 In1 Br2                  | 100.83(11) |
|                       |           | O3 In1 Br2                  | 172.61(10) |
|                       |           | Br1 In1 Br2                 | 98.26(2)   |
|                       |           | In1 O2 In2                  | 107.29(13) |
|                       |           | C6 O1 In2                   | 130.1(3)   |
|                       |           | C6 O1 In1                   | 121.2(3)   |
|                       |           | In2 O1 In1                  | 106.45(13) |

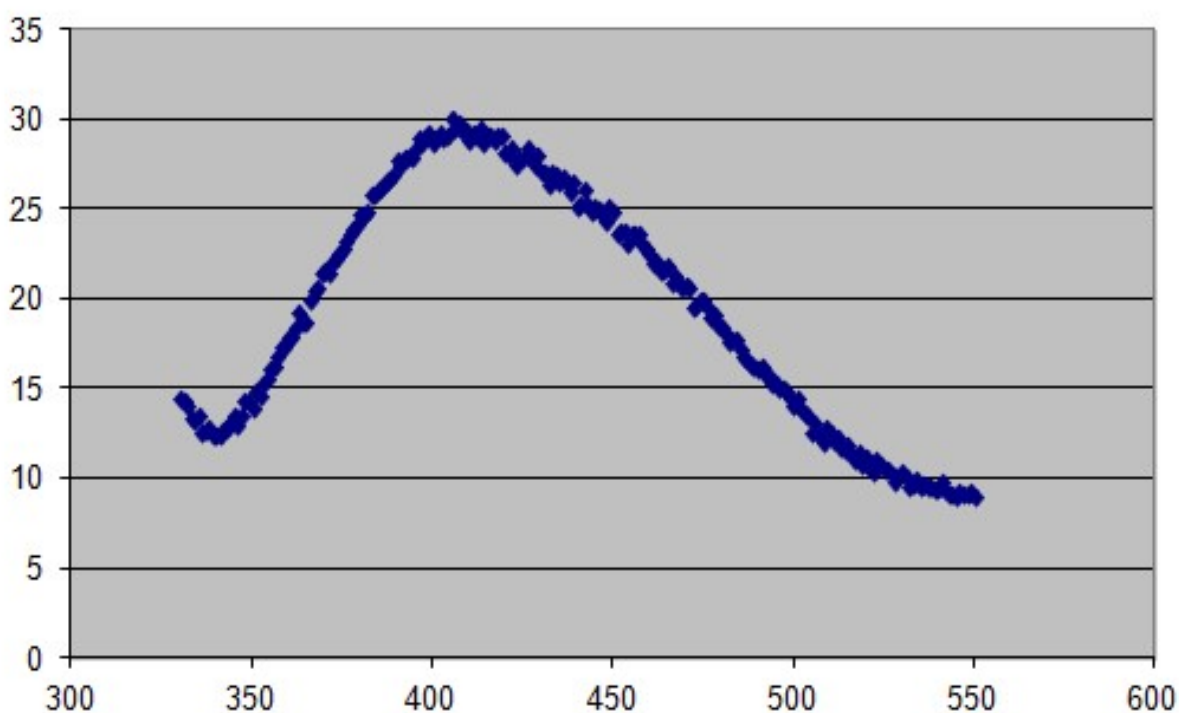

**Fig. S1** Emission spectrum of solid  $[\text{In}_2\text{Br}_4\{(\text{py})(\text{ph})\text{CH}(\text{O})_2\}_2(\text{EtOH})_2]$  (**4**) at room temperature under maximum excitation at 300 nm; the broad emission band is located at  $\sim 410$  nm. This spectrum is in line with the fact that no satisfactory Raman spectrum of **4** could be recorded due to fluorescence. Despite the shorter excitation wavelength (300 nm) in this experiment, compared to the larger excitation laser wavelengths in the Raman experiments (514.5 nm and 632.8 nm), it is clear that a portion of fluorescence remains at  $\lambda > 500$  nm and thus fluorescence dominates the Raman effect.



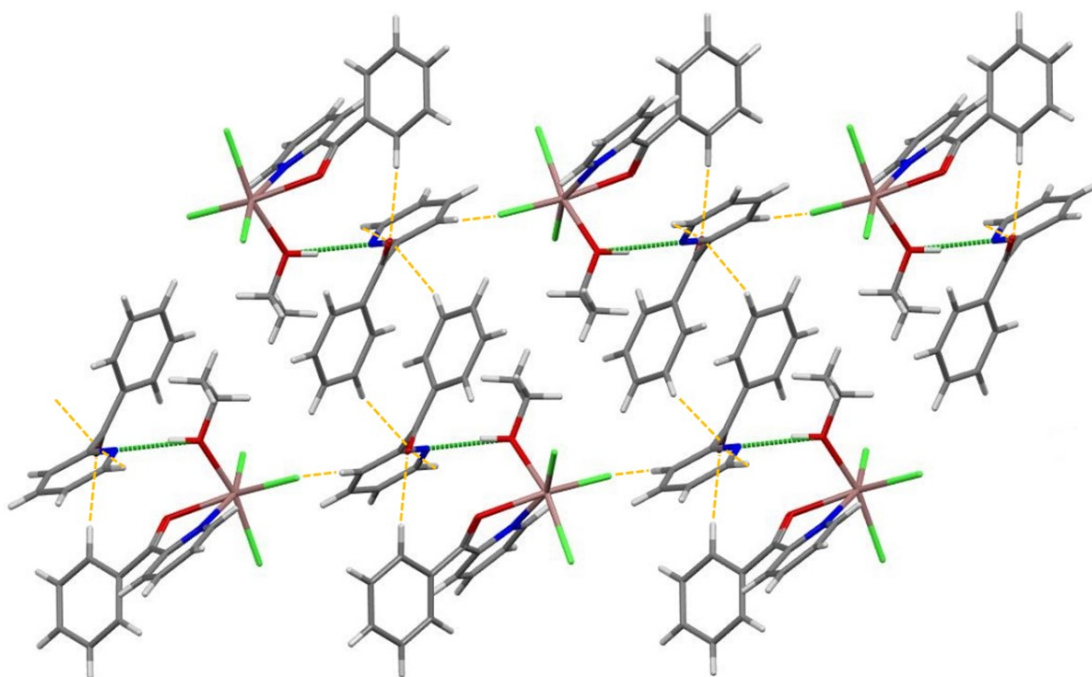

**Fig. S2** Stick representation of the crystal structure of **1** along the *(ac)* plane, showing the packing of the complex molecules and the lattice (ph)(ph)CO molecules interacting through O-H...N H bonds (dashed green lines). The weak intermolecular C-H...O and C-H...Cl interactions are depicted in dashed orange lines. Colour code: C, grey; H, white; N, blue; O, red; Cl, light green; In, brown.

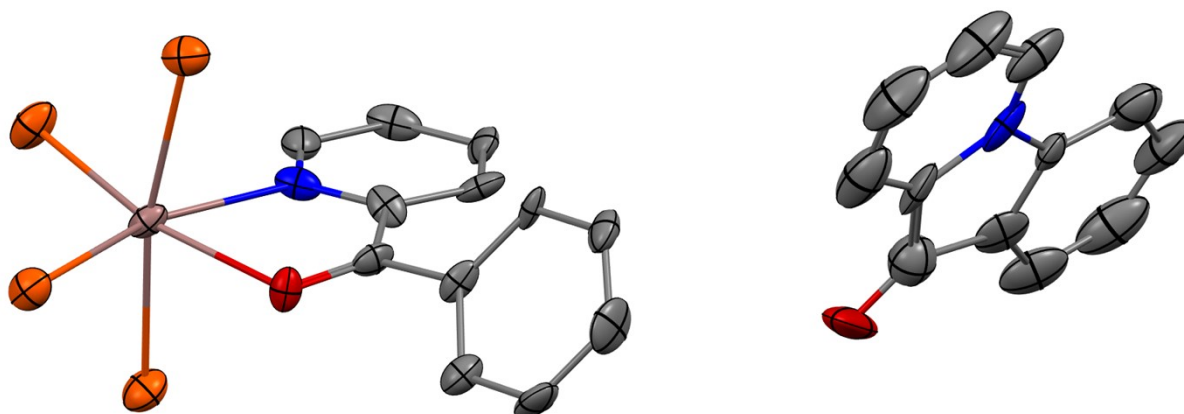

**Fig. S3** Unlabelled ORTEP-type views of the octahedral complex anion  $[\text{InBr}_4\{(\text{ph})(\text{ph})\text{CO}\}]^-$  and the cation  $\text{L}^+$  that are present in the crystal structure of **3** at 120 K. Thermal ellipsoids are depicted at 50% probability level. H atoms are omitted for clarity. Colour code: C, grey; N, blue; O, red; Br, orange; In, brown.

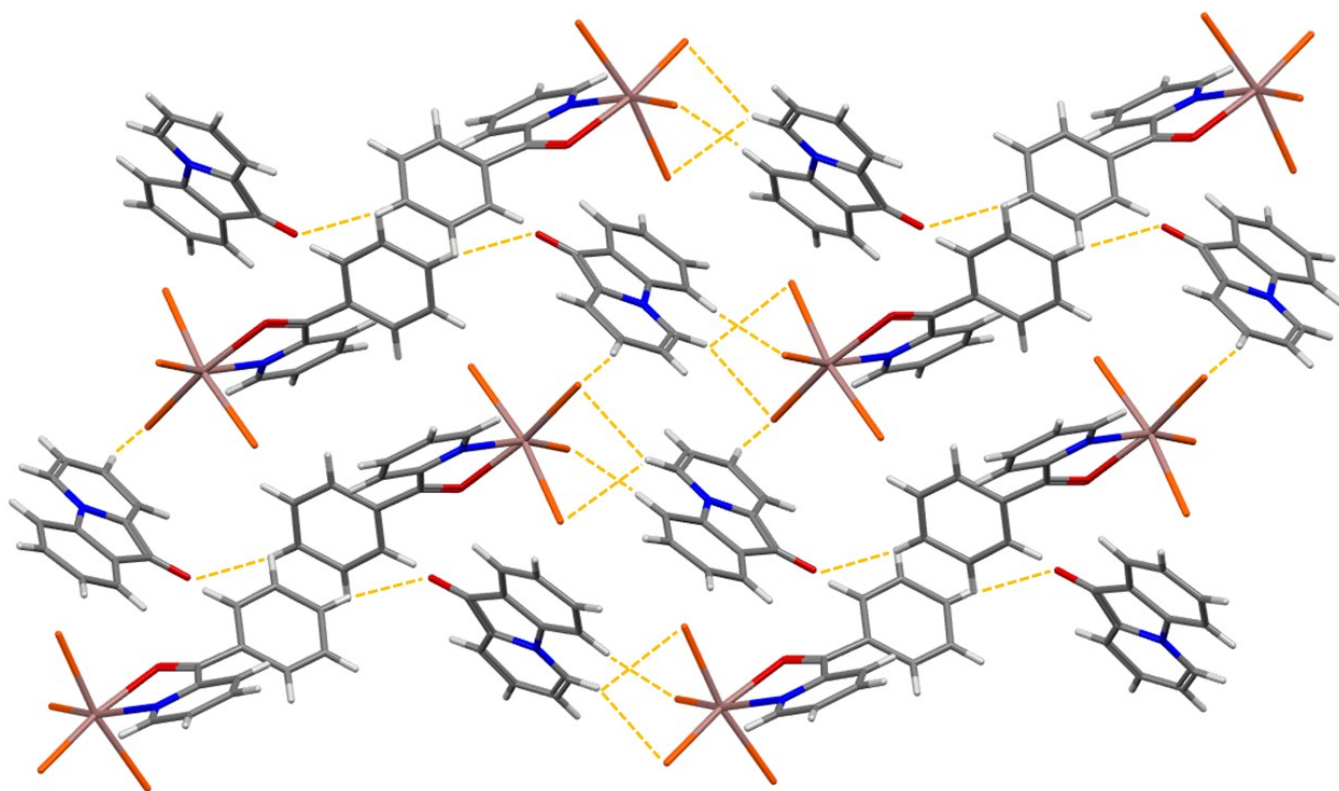

**Fig. S4** Stick representation of the crystal structure of **3** along the (*ac*) plane, showing the packing of the complex anions and the organic cations. The weak intermolecular (a better description is “interionic”) C-H...O and C-H...Br interactions are depicted in dashed orange lines. Colour code: C, grey; H, white; N, blue; O, red; Br, orange; In, brown.

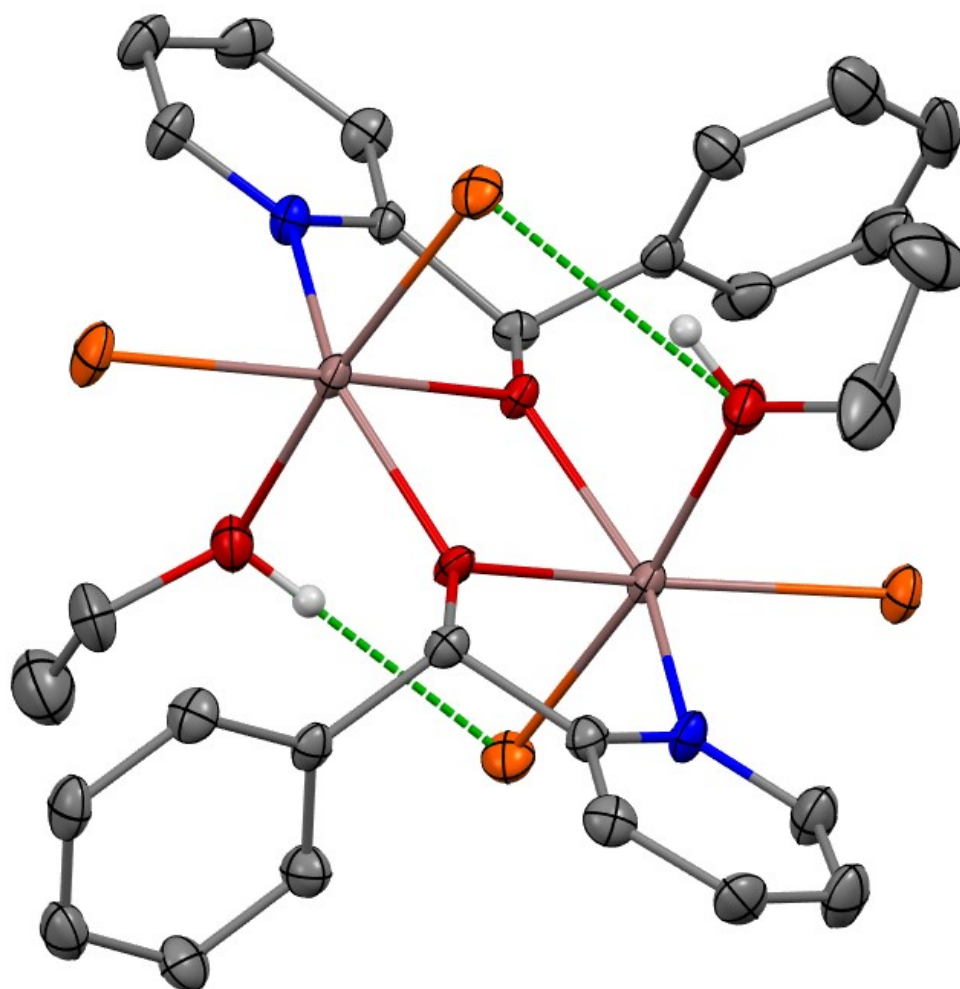

**Fig. S5** Unlabelled ORTEP-type view of the dinuclear molecule that is present in the crystal structure of **4** at 120 K. Thermal ellipsoids are depicted at 50% probability level. The H bonds are represented by dashed green lines. H atoms are omitted for clarity, except those involved in the intramolecular  $O_{\text{ethanol}}\text{-H}\cdots\text{Br}$  H bonds. Colour code: C, grey; N, blue; O, red; Br, orange; In, brown.

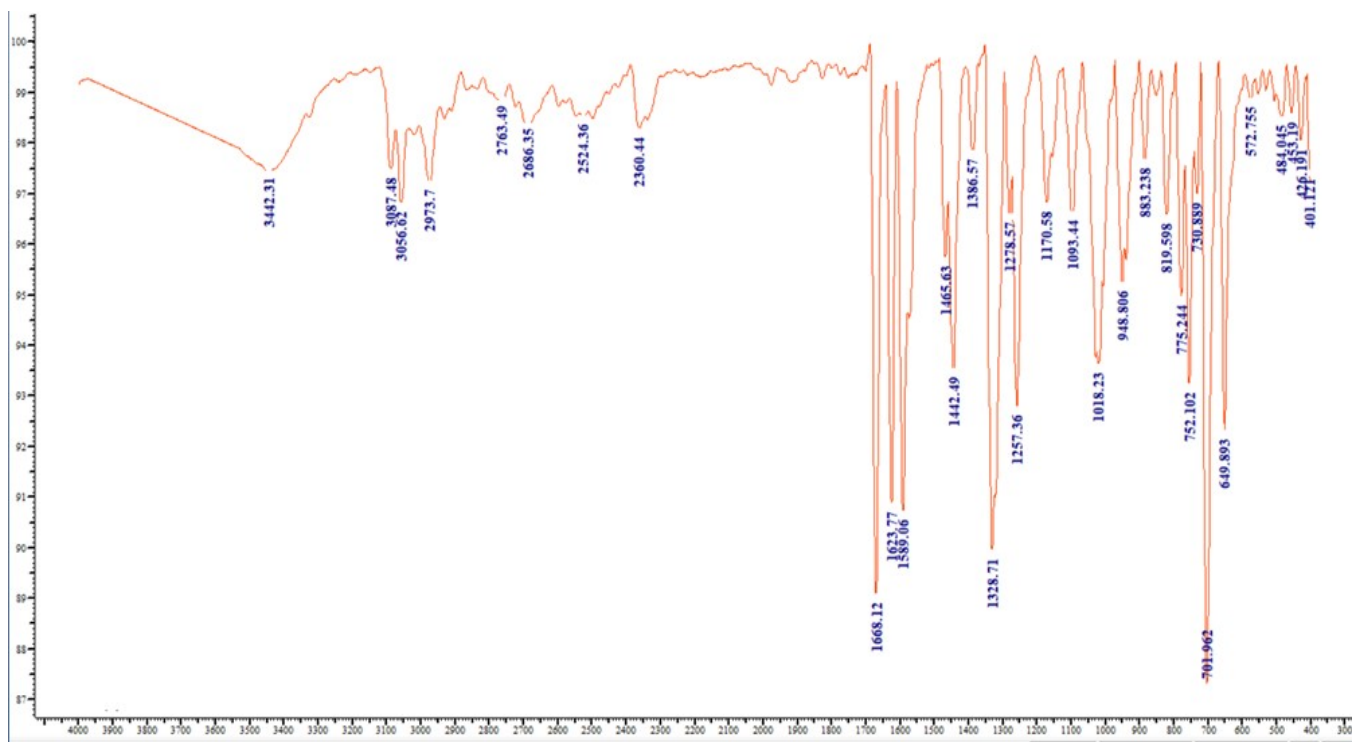

**Fig. S6** The IR spectrum (KBr, cm<sup>-1</sup>) of complex [InCl<sub>3</sub>{(py)(ph)CO}(EtOH)]·{(py)(ph)CO} (1).

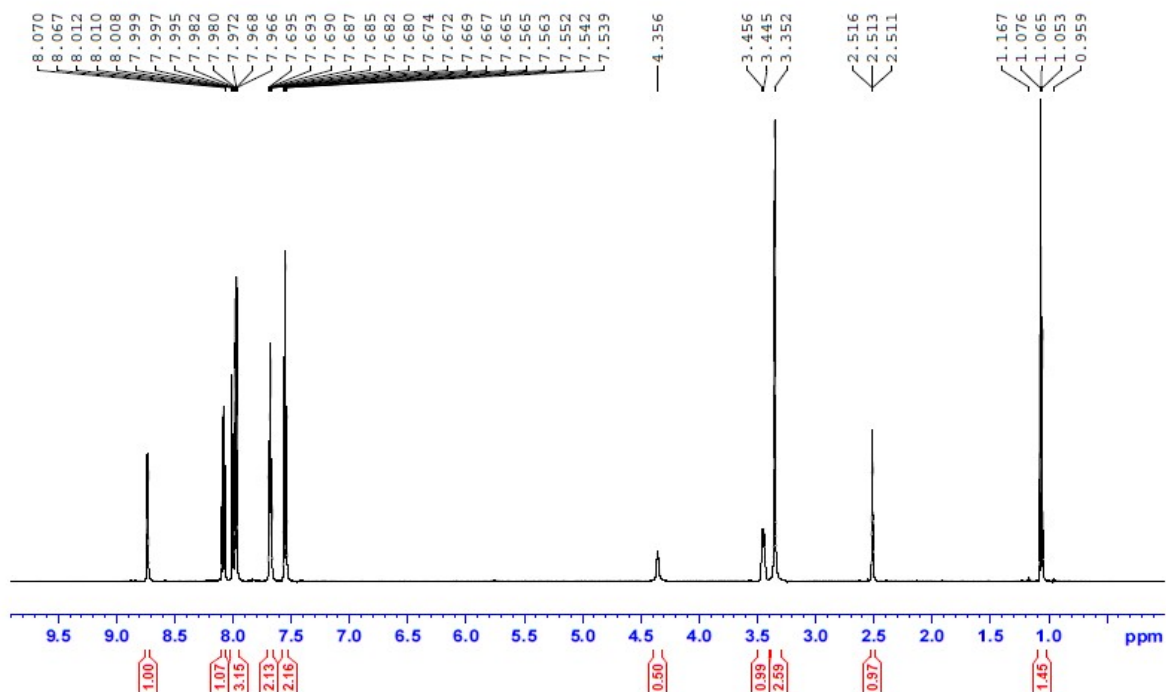

**Fig. S7** The <sup>1</sup>H NMR spectrum (δ/ppm) of complex [InCl<sub>3</sub>{(py)(ph)CO}(EtOH)]·{(py)(ph)CO} (1) in d<sub>6</sub>-DMSO.

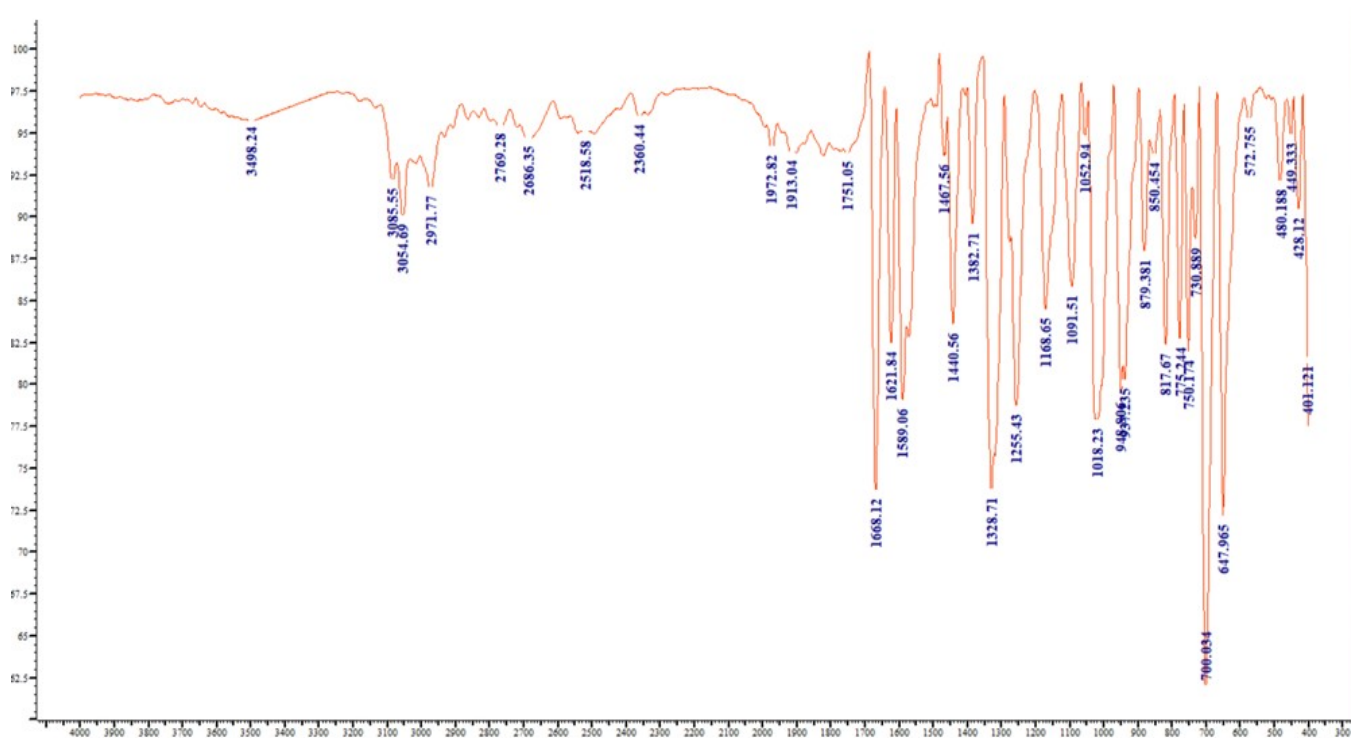

**Fig. S8** The IR spectrum (KBr, cm<sup>-1</sup>) of complex (L) [InBr<sub>4</sub>{(py)(ph)CO}] (3).

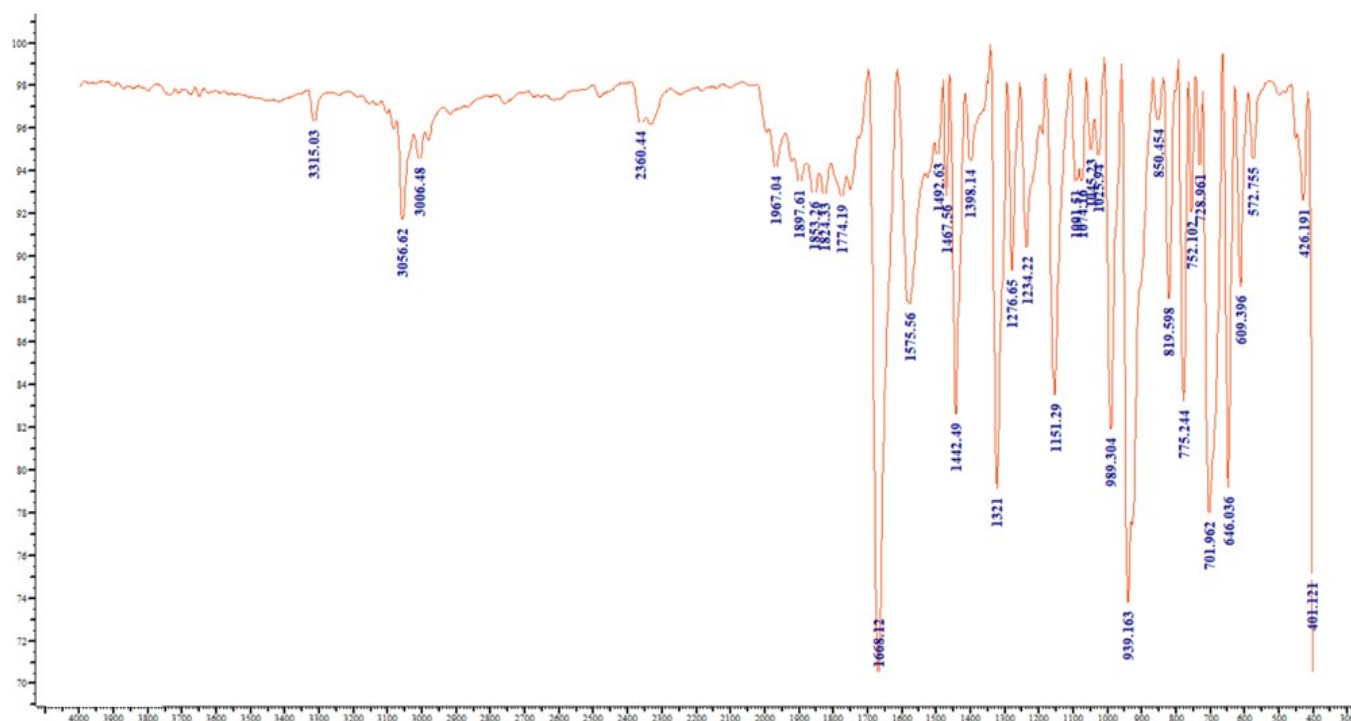

**Fig. S9** The IR spectrum (KBr, cm<sup>-1</sup>) of 2-benzoylpyridine, (py)(ph)CO.

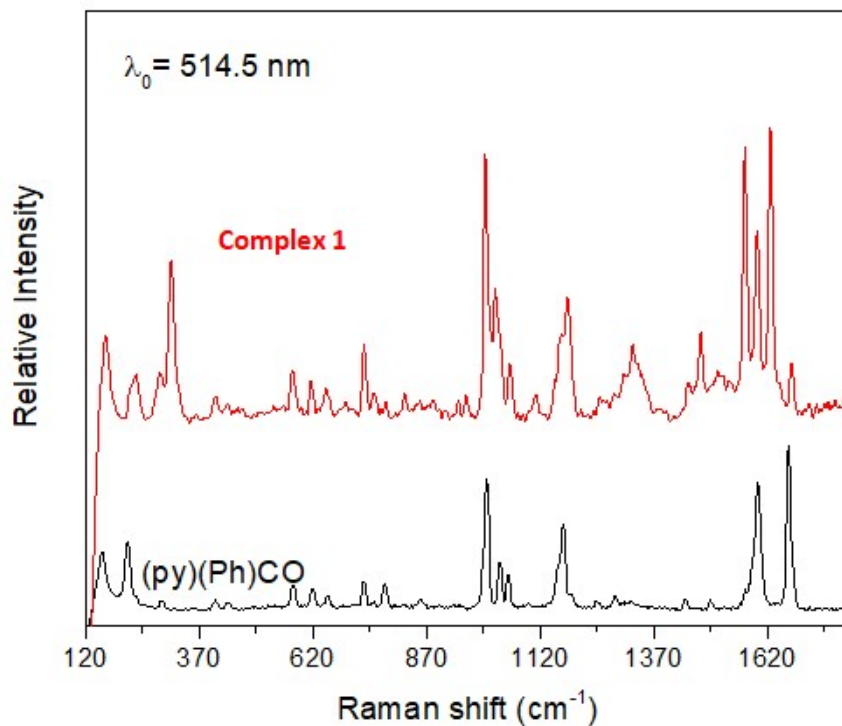

**Fig. S10** The Raman spectra ( $\text{cm}^{-1}$ ) of free (py)(ph)CO (bottom) and complex  $[\text{InCl}_3\{(\text{py})(\text{ph})\text{CO}\}(\text{EtOH})]\cdot\{(\text{py})(\text{ph})\text{CO}\}$  (**1**) in the region  $1750\text{-}120 \text{ cm}^{-1}$ .

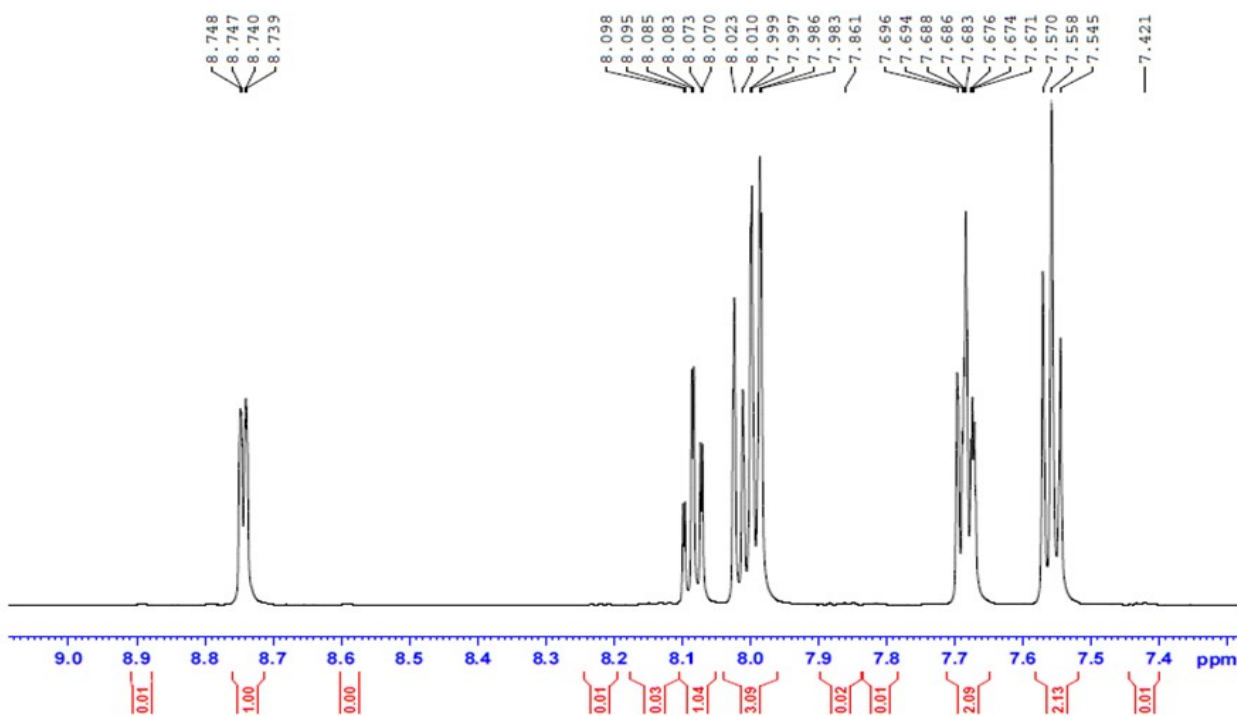

**Fig. S11** The  $^1\text{H}$  NMR spectrum ( $\delta/\text{ppm}$ ) of (py)(ph)CO in the aromatic region; the solvent used is  $d_6$ -DMSO.

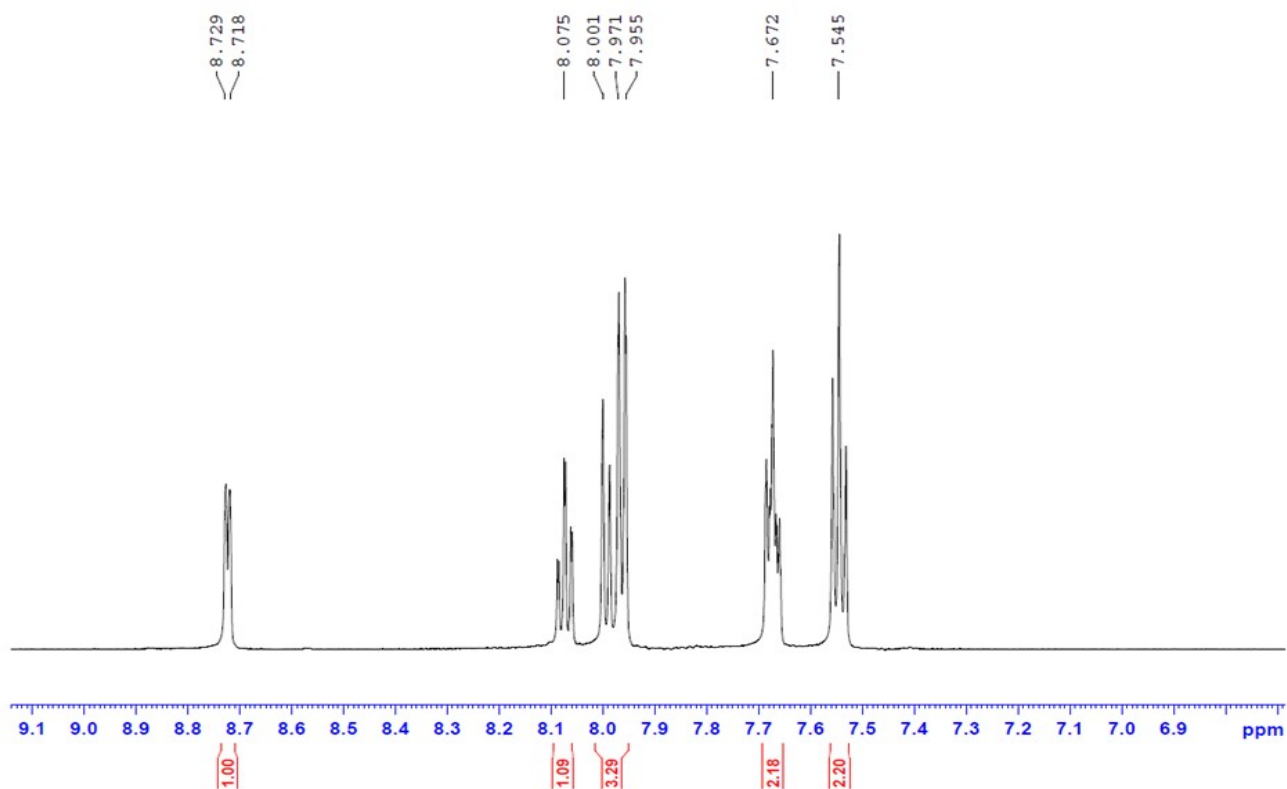

**Fig. S12** The  $^1\text{H}$  NMR spectrum ( $\delta/\text{ppm}$ ) of complex  $[\text{In}_2\text{Br}_4\{(\text{py})(\text{ph})\text{CH}(\text{O})_2\}_2(\text{EtOH})_2]$  (**4**) in the aromatic region; the solvent used is  $d_6$ -DMSO.

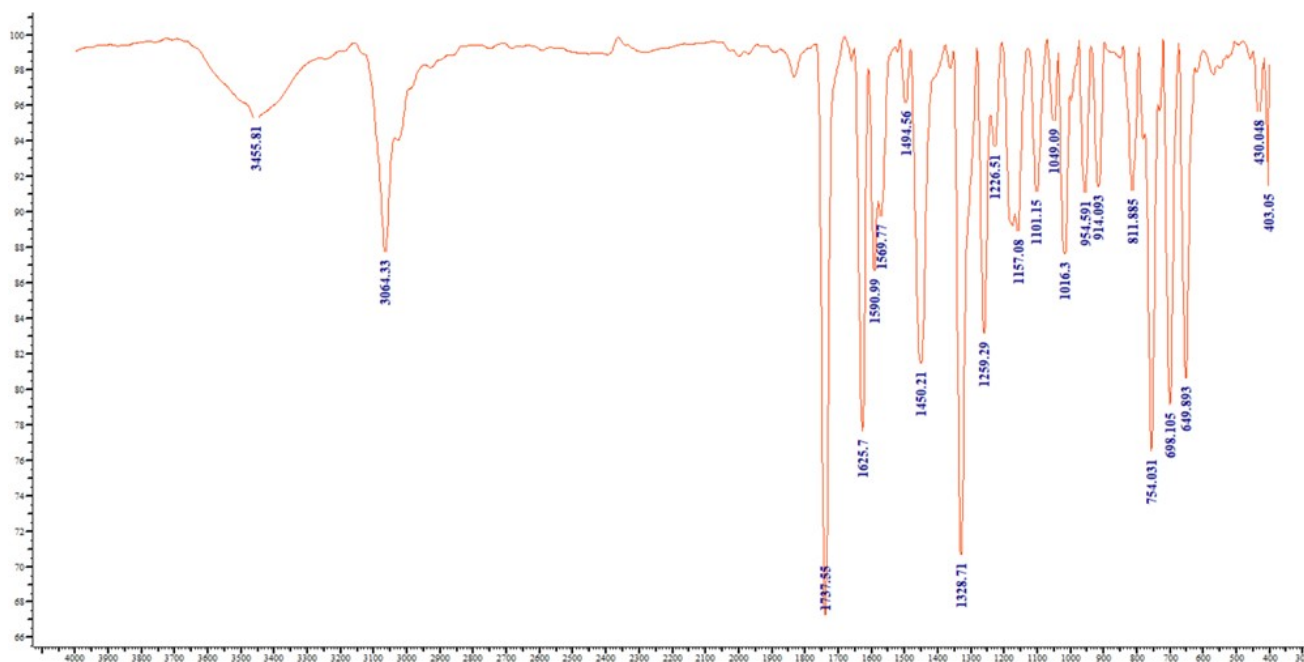

**Fig. S13** The IR spectrum (KBr,  $\text{cm}^{-1}$ ) of compound  $\{(\text{pyH})(\text{ph})\text{CO}\}\text{Cl}$  (**2**). The broad band at  $\sim 3440 \text{ cm}^{-1}$  is due to residual EtOH from incomplete dryness of this particular sample (also evident in the  $^1\text{H}$  and  $^{13}\text{C}\{^1\text{H}\}$  NMR spectra).

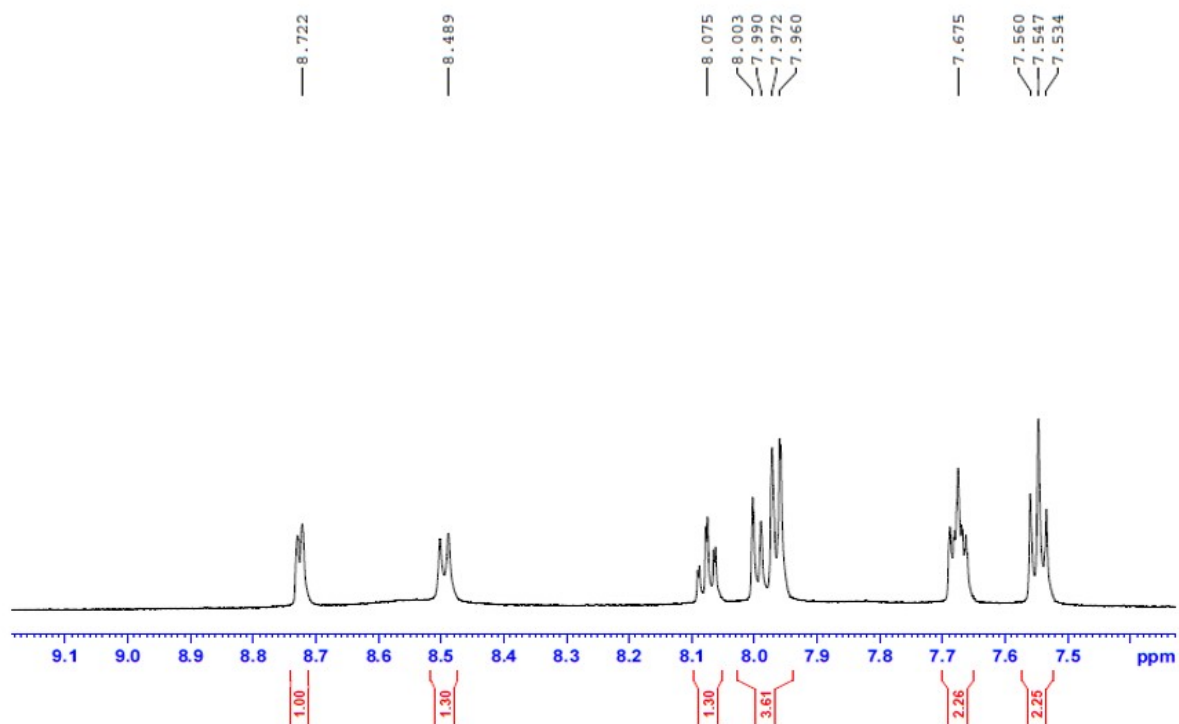

**Fig. S14** The  $^1\text{H}$  NMR spectrum ( $\delta/\text{ppm}$ ) of compound **2** in the 9.2-7.4 ppm region; the solvent used is  $d_6$ -DMSO.

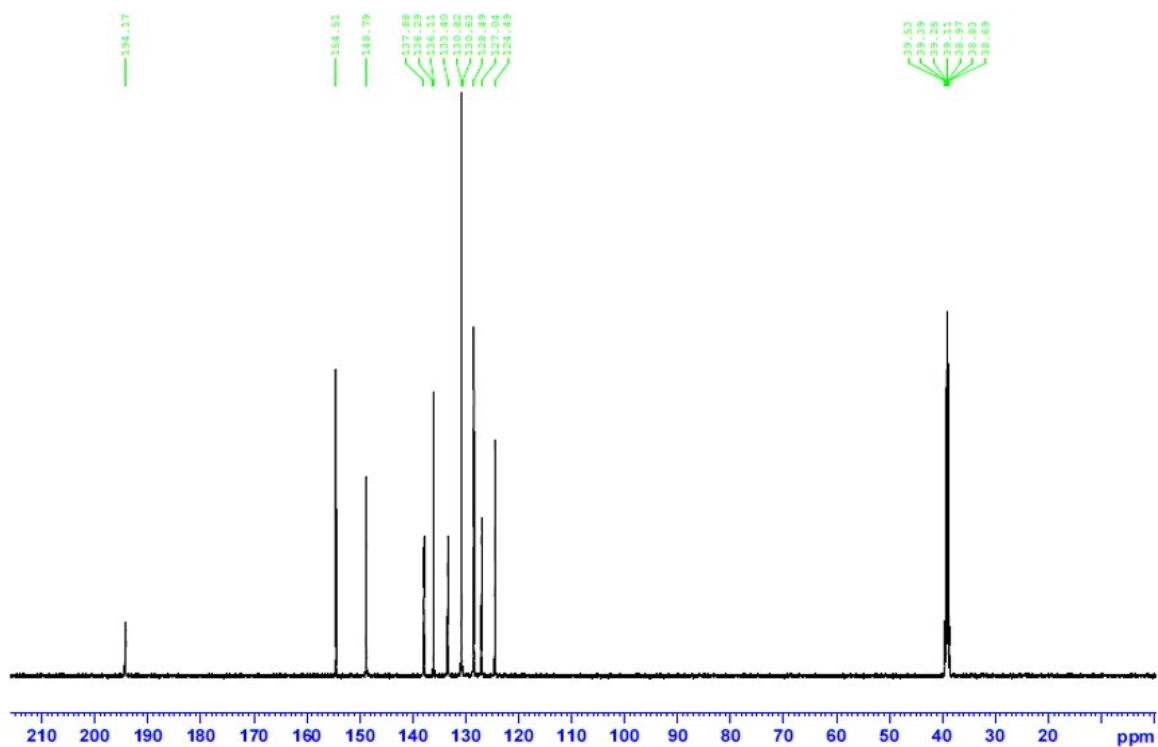

**Fig. S15** The  $^{13}\text{C}\{^1\text{H}\}$  NMR spectrum of  $(\text{py})(\text{ph})\text{CO}$  in  $d_6$ -DMSO; the signal at  $\delta$  39.2 ppm is due to the methyl carbons of the solvent.



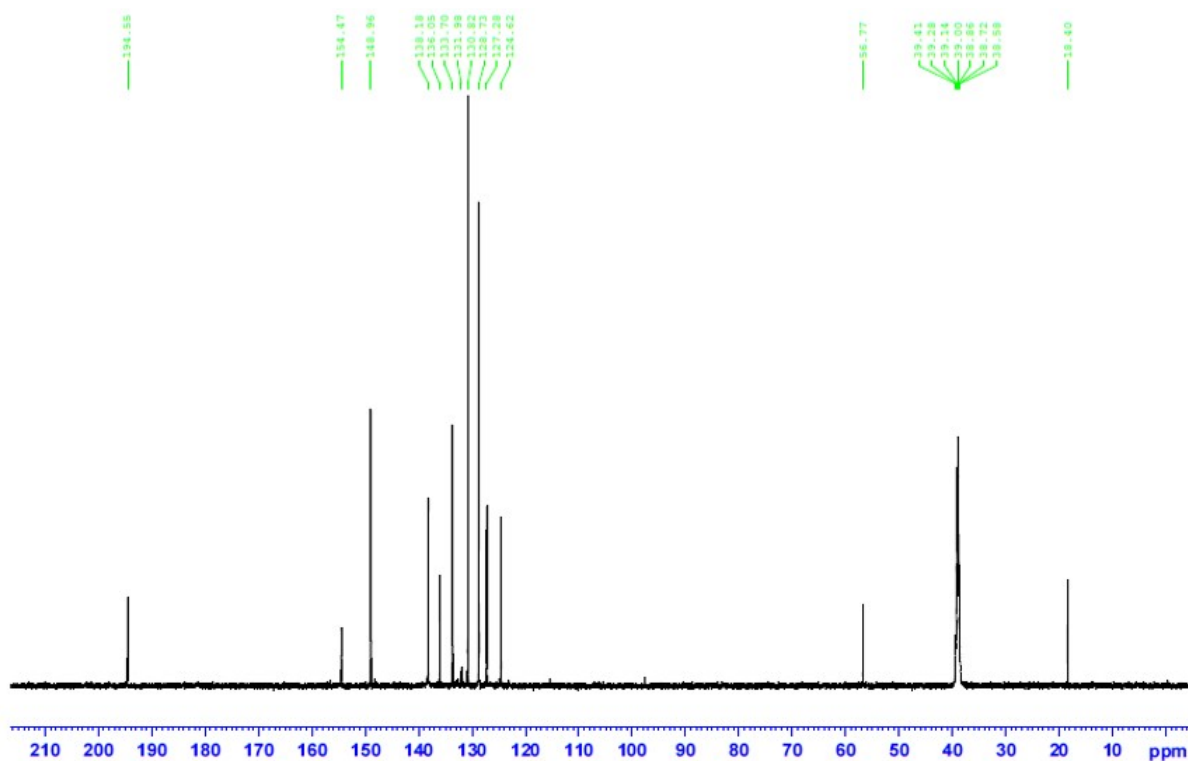

**Fig. S16** The  $^{13}\text{C}\{^1\text{H}\}$  NMR spectrum of (py)(ph)CO in  $d_6$ -DMSO; the signal at  $\delta$  39.1 ppm is due to the methyl carbons of  $d_6$ -DMSO. The signals at  $\delta$  56.8 and 18.4 ppm arise from the carbons of residual EtOH from incomplete dryness of this particular sample; the presence of EtOH in this sample is also evident in its  $^1\text{H}$  NMR and IR spectrum (Fig. S13).

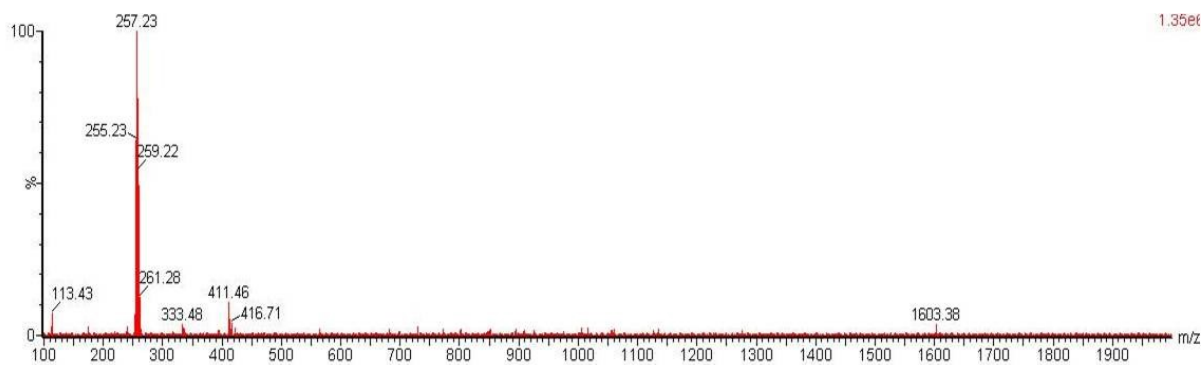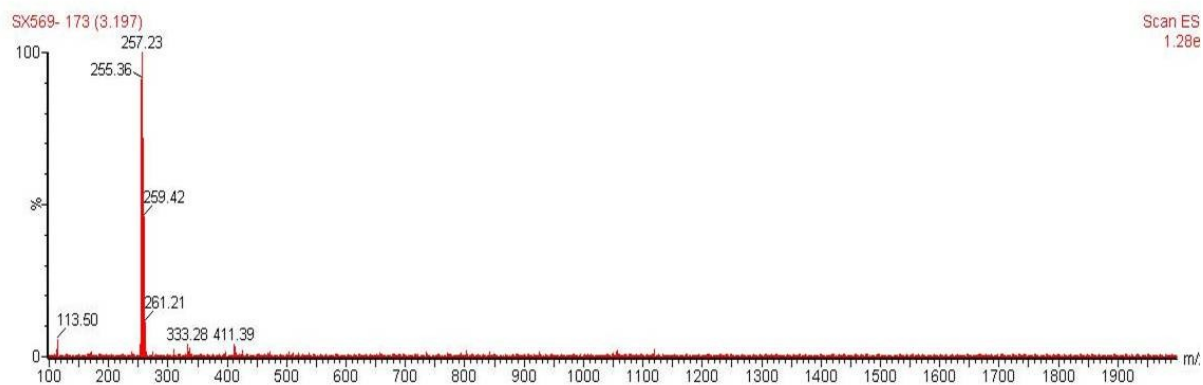

**Fig. S17** The ESI-MS spectrum of  $\{(\text{pyH})(\text{ph})\text{CO}\}\text{Cl}$  (**2**) in the negative mode.
